# Supplementary material for: Multidecade Mortality and a Homolog of Hepatitis C Virus in Bald Eagles (Haliaeetus leucocephalus), the National Bird of the USA
Source: PubMed Central journal article supplement (PMC6802099; doi:10.1038/s41598-019-50580-8), 2019-10-18
Supplement: 41598_2019_50580_MOESM1_ESM.pdf [file 41598_2019_50580_MOESM1_ESM.pdf]

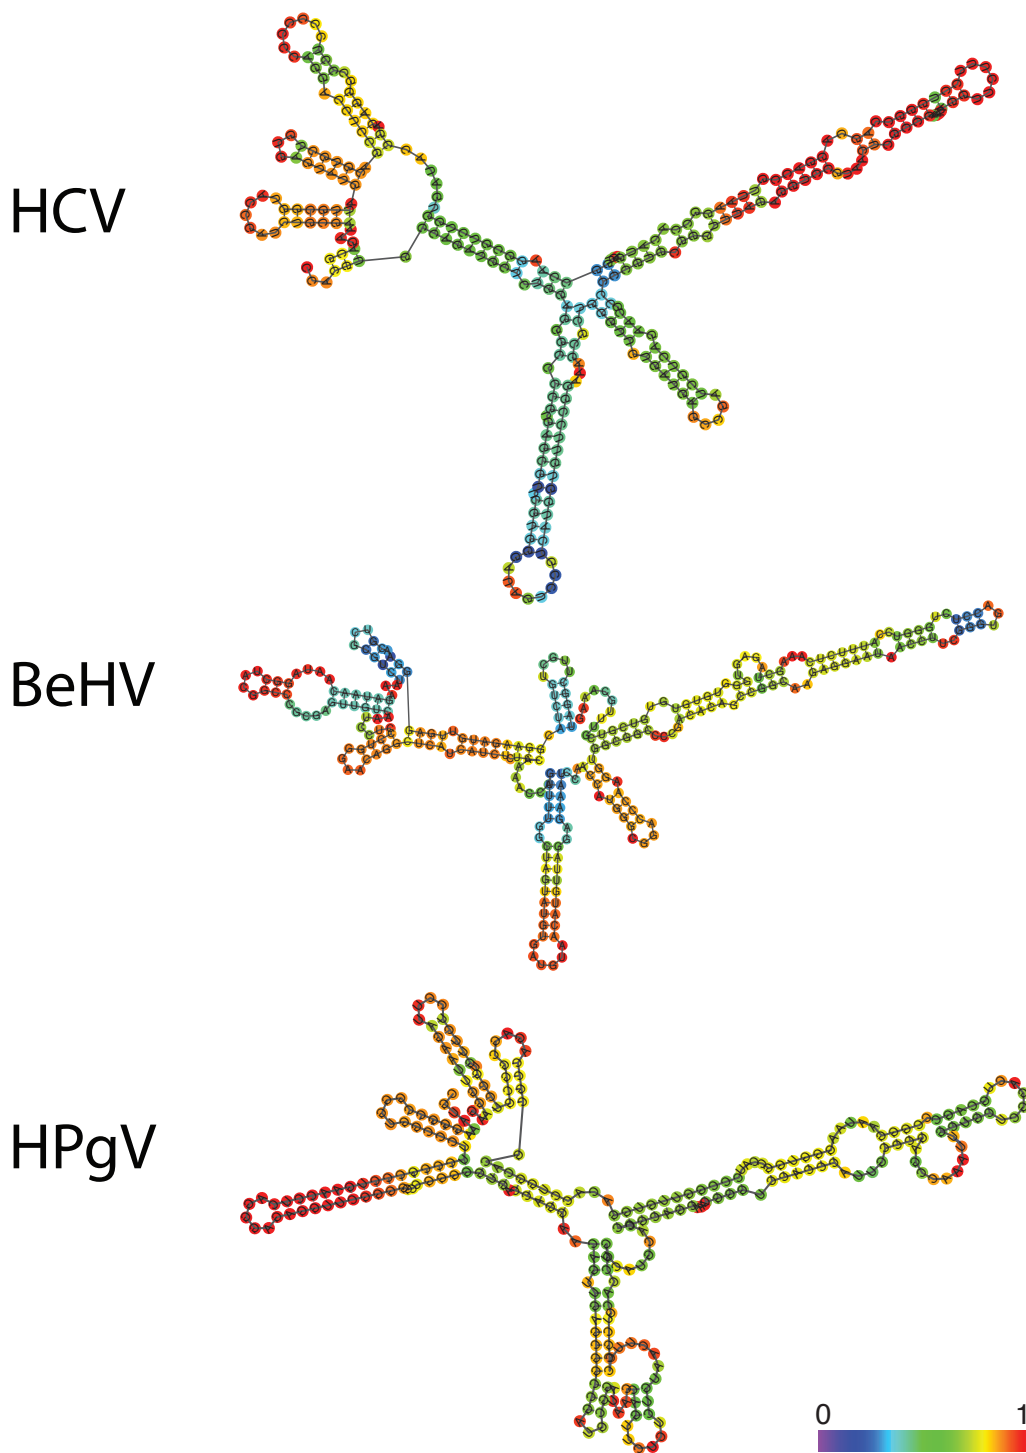

**Supplementary Figure S1:** Predicted RNA secondary structures of homologous regions of 5' untranslated regions of hepatitis C virus, genotype 1 (HCV; GenBank accession number NC\_004102), bald eagle hepacivirus (BeHV; GenBank accession number MN062427), and the human pegivirus GB virus C (HPgV; GenBank accession number NC\_001710). Structures are minimum free energy predictions (-110.12, -87.67, and -118.62 kcal/mol, respectively) generated by the RNAfold algorithm on the Vienna RNA Website server<sup>92,93</sup>; colored scales indicate base-pair probabilities.
